# Supplementary material
Source: publisher figshare collection journal article supplement (https://acs.figshare.com/ndownloader/files/3713995)
Supplement: Supplementary file 1 [file 3713995]

## **SUPPORTING INFORMATION**

### **CO<sub>2</sub> Capture by Temperature Swing Adsorption:**

#### **Use of Hot CO<sub>2</sub>-Rich Gas for Regeneration**

**Augustine Ntiamoah<sup>1,2</sup>, Jianghua Ling<sup>1,2,3</sup>, Penny Xiao<sup>1,2</sup>, Paul A. Webley<sup>1,2,\*</sup>, Yuchun Zhai<sup>3</sup>**

<sup>1</sup>Cooperative Research Centre for Greenhouse Gas Technologies (CO2CRC), Australia.

<sup>2</sup>Department of Chemical & Biomolecular Engineering, The University of Melbourne,  
Parkville, VIC 3010, Victoria, Australia.

<sup>3</sup>School of Material and Metallurgy, Northeastern University, Shenyang, Liaoning  
110004, PR China

**\*Corresponding author: e-mail address: paul.webley@unimelb.edu.au**

Table S1: Calculation of theoretical working capacities from isotherm data at different regeneration temperatures

| Adsorption/Desorption Temperature                                                                                                   | 30°C  | 150°C | 200°C | 250°C |
|-------------------------------------------------------------------------------------------------------------------------------------|-------|-------|-------|-------|
| $q_1$ (mol. CO <sub>2</sub> /kg.ads) = quantity of CO <sub>2</sub> adsorbed at adsorption conditions i.e. 0.15 bar, 30 °C           | 2.080 |       |       |       |
| $q_2$ (mol. CO <sub>2</sub> /kg.ads) = quantity of CO <sub>2</sub> adsorbed at regeneration conditions i.e. 1 bar, T <sub>des</sub> |       | 0.740 | 0.380 | 0.096 |
| Working capacity (mol. CO <sub>2</sub> /kg.ads) = $q_1 - q_2$                                                                       |       | 1.34  | 1.700 | 1.984 |

Table S2: Summary of molar flows of CO<sub>2</sub> into and out of the bed: Cycle 2- regeneration by indirect heating followed by hot gas purge

|                                           | Regeneration temperature (°C) |         |                        |
|-------------------------------------------|-------------------------------|---------|------------------------|
|                                           | 150                           | 200     | 250                    |
| <i>Adsorption step</i>                    |                               |         |                        |
| Total feed flow                           | 0.2758                        | 0.3228  | 0.3420                 |
| Flow of CO <sub>2</sub> into bed          | 0.04137                       | 0.0484  | 0.0513 mol             |
| Amount of CO <sub>2</sub> in vent stream  | 0.0023                        | 0.00175 | 0.00168 mol            |
| <i>Regeneration step</i>                  |                               |         |                        |
| Amount of CO <sub>2</sub> desorbed        | 0.1031                        | 0.1167  | 0.1246 mol             |
| Total Flow of purge gas into bed          | 0.0816                        | 0.0796  | 0.0805 mol             |
| CO <sub>2</sub> recovered from bed        | 0.0215                        | 0.0371  | 0.0441 mol             |
| <i>Cooling (N<sub>2</sub> purge) step</i> |                               |         |                        |
| Amount of CO <sub>2</sub> in vent stream  | 0.0175                        | 0.0095  | 0.00552 mol            |
| <i>Potential improved performance</i>     |                               |         |                        |
| *Additional amount of product to recover  | 0.01024                       | 0.00558 | 0.00434 mol            |
| *Purity                                   | 84.66                         | 87.86   | 89.24 %CO <sub>2</sub> |
| *Recovery                                 | 76.72                         | 88.18   | 94.43 %CO <sub>2</sub> |

\* New performance figures resulting from recycling the initial effluent of the N<sub>2</sub> purge step up to a CO<sub>2</sub> concentration of 50% directly to the product.

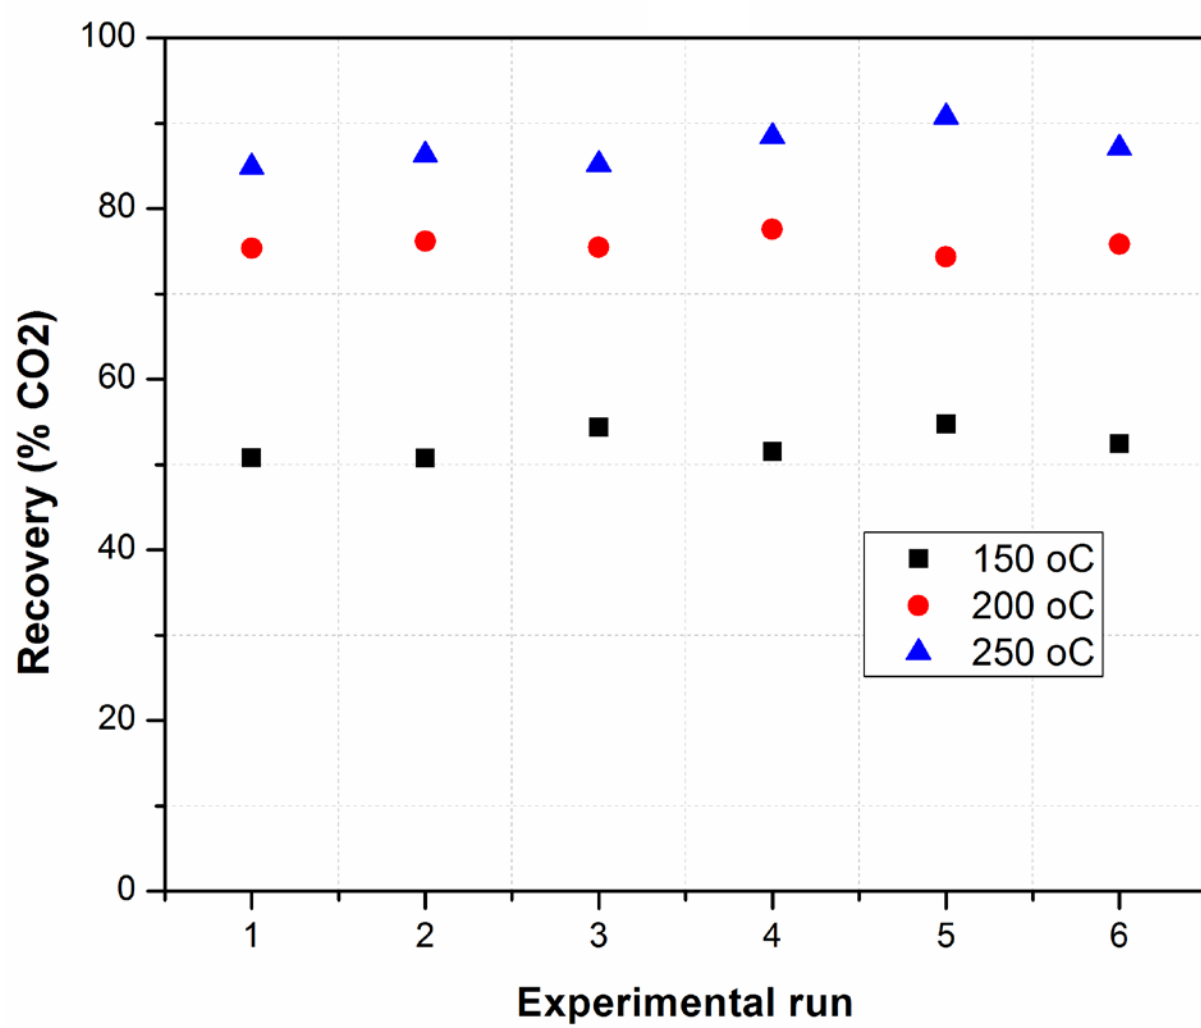

Figure S1. Effect of regeneration temperature on CO<sub>2</sub> recovery

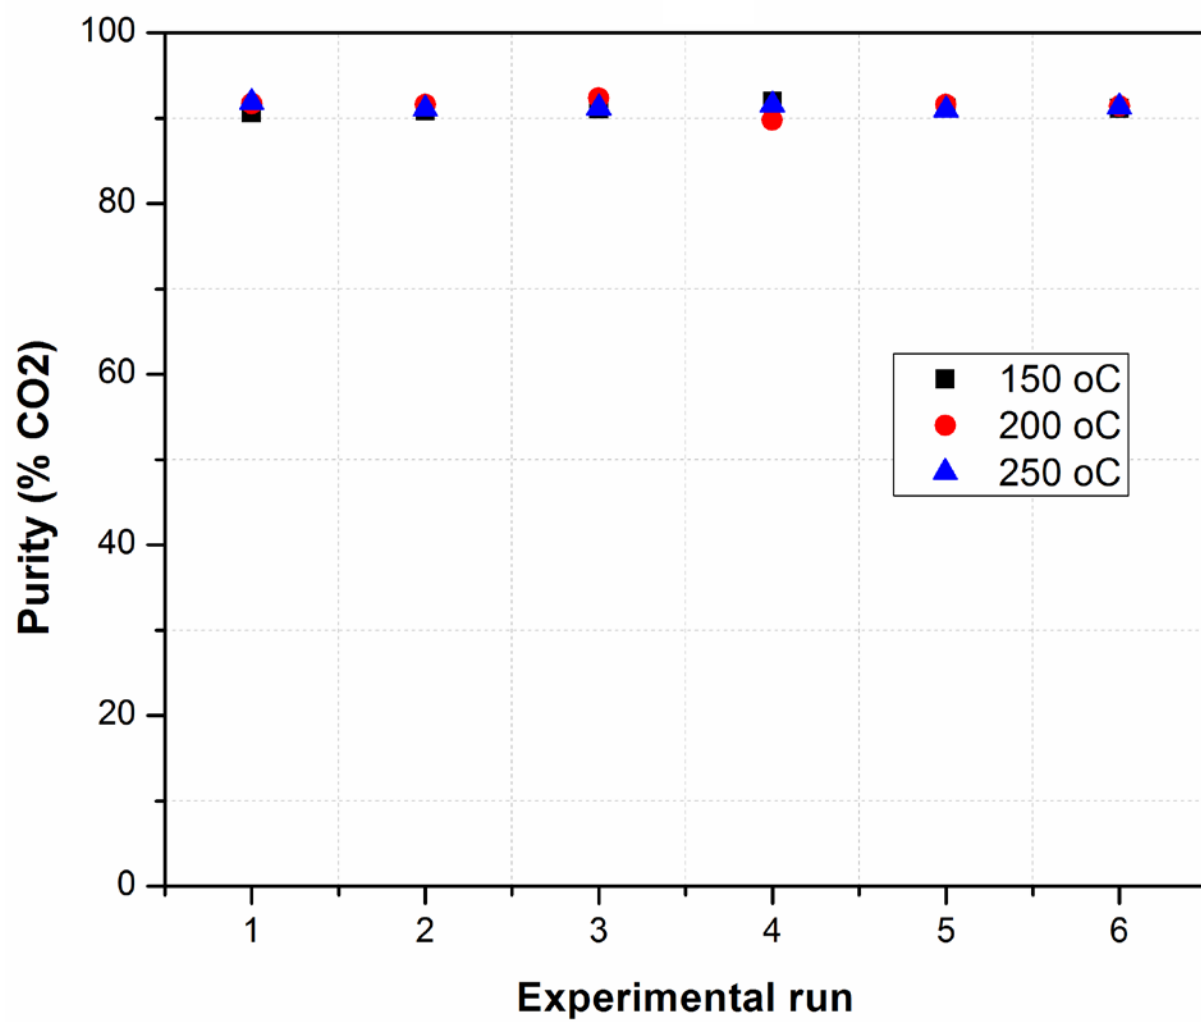

Figure S2. Effect of regeneration temperature on CO<sub>2</sub> purity

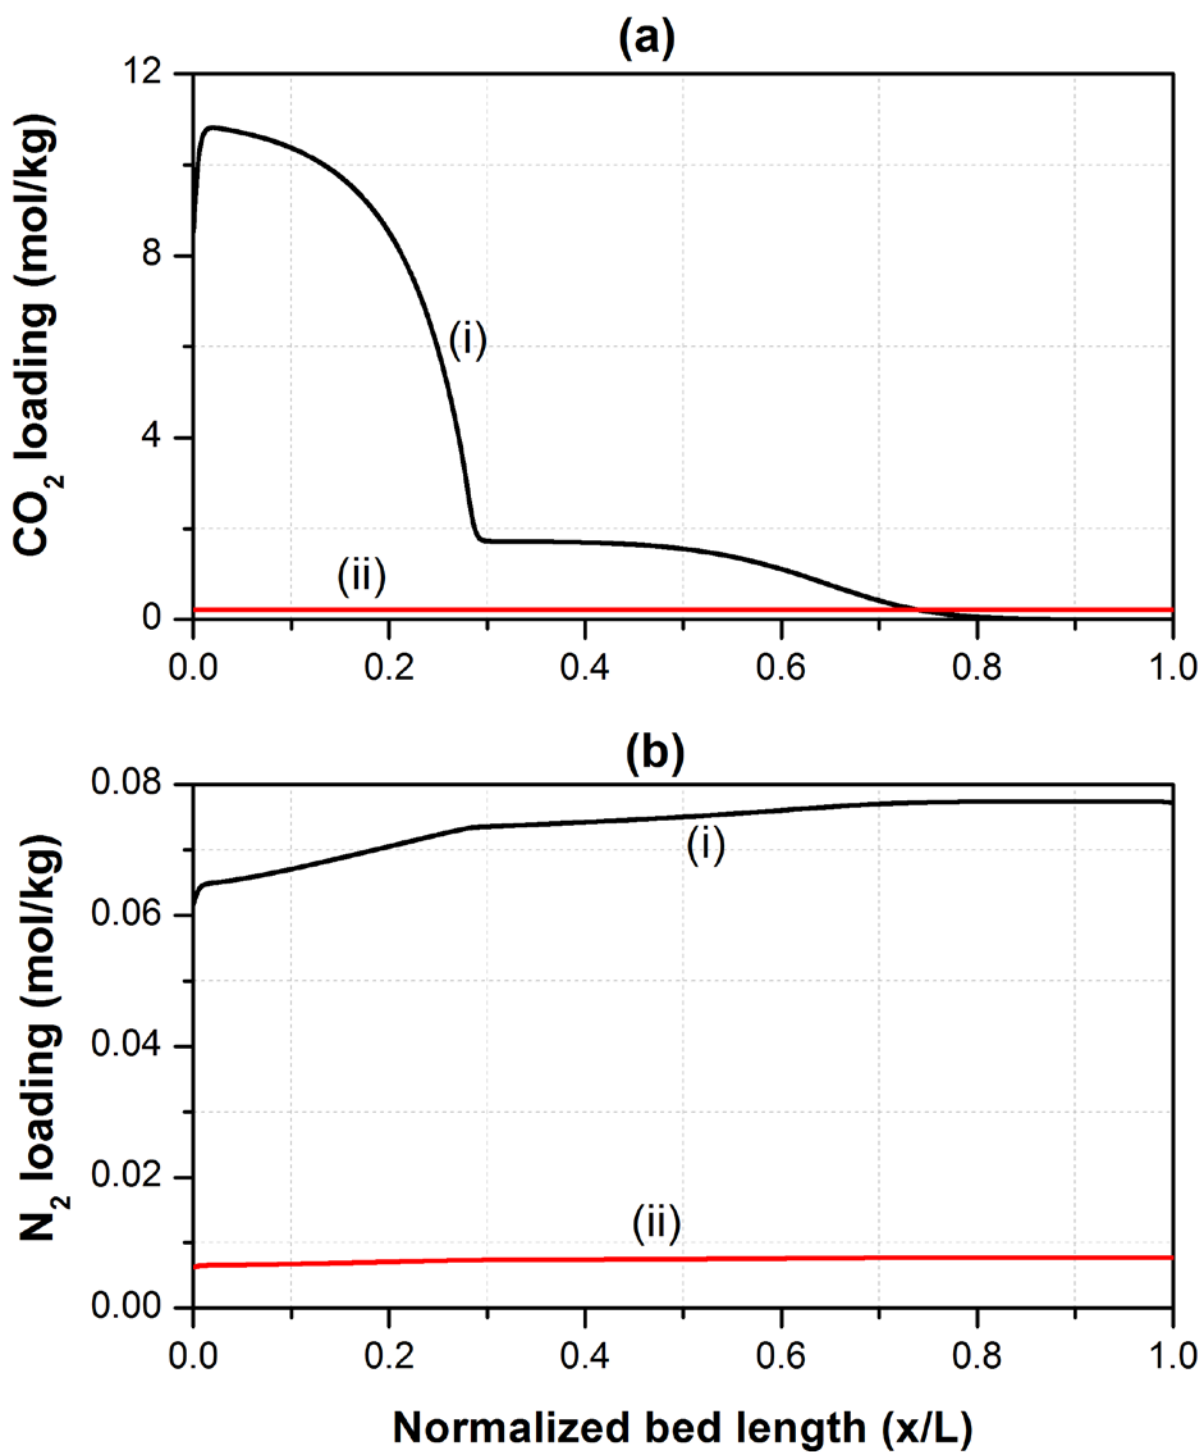

Fig. S3. Cyclic steady state (a) CO<sub>2</sub> loading profiles and (b) N<sub>2</sub> loading profiles on the adsorbent at the ends of product rinse and desorption steps (for regeneration temperature of 250 °C); (i) = profile at end of rinse step, (ii) = profile at end of desorption step.

$$\text{Working Selectivity} = \frac{CO_2 \text{ working capacity}}{N_2 \text{ working capacity}} = \frac{CO_2 \text{ loading}_{(\text{prod rinse})} - CO_2 \text{ loading}_{(\text{des})}}{N_2 \text{ loading}_{(\text{prod rinse})} - N_2 \text{ loading}_{(\text{des})}} \quad \text{Eq. S1}$$
